# Supplementary material
Source: HighWire-hosted journal article supplement (http://jnm-client.smart01.highwire.org/highwire/filestream/125034/field_highwire_adjunct_files/0/267869_Supplemental_Data.pdf)
Supplement: 267869_Supplemental_Data.pdf [file 267869_Supplemental_Data.pdf]

Supplemental Table 1: Completed or ongoing randomized trials and clinical studies using biomarkers as surrogate endpoints

| Study                             | Condition                             | Modality                 | Variables used                        | Findings                                                                                                                                                                                                                      |
|-----------------------------------|---------------------------------------|--------------------------|---------------------------------------|-------------------------------------------------------------------------------------------------------------------------------------------------------------------------------------------------------------------------------|
| COURAGE trial nuclear substudy(1) | Obstructive CAD                       | Tc99m/Thallium SPECT MPI | %Ischemic TPD                         | PCI + OMT led to a greater reduction in ischemia compared to OMT alone. Patients with $\geq 5\%$ ischemia reduction had lower unadjusted risk for death or myocardial infarction.                                             |
| BARI-2D trial nuclear substudy(2) | Obstructive CAD                       | SPECT MPI                | %Stress TPD, Rest TPD, % Ischemic TPD | Patients randomized to revascularization had lower stress perfusion abnormalities at 1 year compared to those randomized to medical therapy. 1 year stress TPD was associated with an increased hazard of cardiac death or MI |
| INSPIRE trial(3)                  | Obstructive CAD                       | Tc-99m SPECT MPI         | Change in total and ischemic TPD      | Similar and comparable reductions in TPD and Ischemic TPD in IMT and Revascularization (PCI or CABG) arms. Ischemia suppression was achieved in 80% of patients randomized to either strategy.                                |
| ADVANCE trial(4)                  | Obstructive CAD                       | Tc-99m SPECT MPI         | Stress TPD, Ischemic TPD              | Scintigraphic results including size and severity of perfusion abnormalities and extent of ischemia were similar among patients randomized to use of regadenoson as a stressor compared to adenosine.                         |
| Mahmari et al 1994(5)             | Obstructive CAD                       | Tl-201 SPECT             | Change in Stress TPD                  | Significant reduction in total perfusion defect size with nitroglycerin patch vs. placebo                                                                                                                                     |
| ACME trial substudy(6)            | 1 and 2 vessel obstructive CAD        | Tl-201 SPECT             |                                       | Patients with ischemia on SPECT present at 6 months in either arm had higher mortality vs. those without ischemia (18% vs.8%, $p=0.02$ ). Patients with higher % ischemia had higher mortality                                |
| Burns et al 2001(7)               | Obstructive CAD and refractory angina | Tc-99m SPECT             | Stress TPD, Ischemic TPD              | No difference in perfusion defect between transmural laser revascularization and control arms                                                                                                                                 |
| Grines et al 2003(8)              | Obstructive CAD, Stable angina        | Tc99m SPECT              | Change in ischemic TPD                | Intracoronary injection of adenoviral gene for fibroblast growth factor (Ad5FGF-4) overall did not improve myocardial perfusion, but showed a trend towards improved perfusion compared to placebo                            |

|                               |                                              |                                        |                            |                                                                                                                                                                                                                                                          |
|-------------------------------|----------------------------------------------|----------------------------------------|----------------------------|----------------------------------------------------------------------------------------------------------------------------------------------------------------------------------------------------------------------------------------------------------|
| VIVA trial(9)                 | Obstructive CAD stable angina                | Tc99m SPECT                            | Summed Stress Score        | Low or high dose recombinant human vascular endothelial growth factor protein did not improve perfusion vs. placebo at 60 days.                                                                                                                          |
| Aqel et al. 2008(10)          | Obstructive HCM                              | Rest Tc-99mSPECT                       | Rest perfusion defect size | Alcohol septal ablation leads to small basal septal infarct and perfusion defect, which improves with time.                                                                                                                                              |
| Venkatraman et al. 2011(11)   | Obstructive CAD                              | Tc-99m SPECT                           | Stress TPD, Ischemic TPD   | Ranolazine does not improve myocardial perfusion                                                                                                                                                                                                         |
| Bober et al 2019(12)          | Stable obstructive CAD                       | Rb-82 PET                              | Stress MBF                 | Stress MBF improved when revascularization targeted to regions with reduced CFC and relative perfusion abnormalities on baseline PET, but not when revascularization was performed among patients without reduced CFC or abnormal perfusion at baseline. |
| PACIFIC substudy(13)          | Obstructive CAD                              | O15-H2O PET                            | Stress MBF, MBFR,          | Stress MBF and MBFR improved post revascularization, Improvement in stress MBF and MBFR paralleled improvement in FFR. PCI led to a greater improvement of regional stress MBF vs. CABG.                                                                 |
| deWinter et al 2022(14)       | Stable obstructive CAD                       | [ <sup>15</sup> O]H <sub>2</sub> O PET | Stress MBF, MBFR, CFC      | Stress MBF, MBFR, CFC increased with successful revascularization (PCI or CABG), an increase in CFC was independently associated with lower rates of death and non-fatal MI                                                                              |
| Parodi O et al. Circ 1999(15) | Hypertension                                 | N13NH3 PET                             | Stress MBF                 | Stress MBF improved in patients randomized to verapamil but not enalapril                                                                                                                                                                                |
| Buus NH et al. 2004(16)       | Hypertension                                 | PET                                    | MBFR                       | Patients randomized to perindopril had improvement in MBFR after 1 year but not those randomized to atenolol                                                                                                                                             |
| Yokoyama I et al 2004(17)     | Hyperlipidemia                               | N13 NH3 PET                            | Stress MBF                 | Stress MBF improved with simvastatin but not pravastatin                                                                                                                                                                                                 |
| Akinboboye O et al. 2002(18)  | Hypertension and LVH                         | O15-H2O PET                            | Stress MBF and MBFR        | MBFR and stress MBF improved with lisinopril but not losartan.                                                                                                                                                                                           |
| Baller D et al. 1999(19)      | Hyperlipidemia and Microvascular Dysfunction | N13-NH3 PET                            | MBFR                       | Simvastatin for 6 months improves CFR                                                                                                                                                                                                                    |

|                                                      |                                          |                                 |                                                                   |                                                                                                                                                                                                                                  |
|------------------------------------------------------|------------------------------------------|---------------------------------|-------------------------------------------------------------------|----------------------------------------------------------------------------------------------------------------------------------------------------------------------------------------------------------------------------------|
| Safdar B et al<br>2017(20)                           | Coronary<br>microvascular<br>Dysfunction | Rb-82 PET                       | MBFR                                                              | Ranolazine improved MBFR at 30 days by 17% vs. placebo. Mean change in MBFR similar with ranolazine vs. placebo                                                                                                                  |
| Cheng K et al.(21)<br>(pre-post)                     | Refractory<br>angina and<br>CAD          | Rb-82 PET                       | Change in MBFR,<br>change in stress<br>MBF, change in<br>rest MBF | Overall, there was no change in MBF, rest or stress MBF with coronary sinus reducer therapy. However, patients with baseline MBFR <1.8 had an improvement in stress MBF and MBFR, but patients with baseline MBFR >=1.8 did not. |
| LiiRA study (pre-<br>post)(22)<br><i>NCT02714881</i> | Rheumatoid<br>Arthritis                  | N13 NH3<br>PET MPI              | Change in global<br>MBFR                                          | No change in MBFR with TNF-alpha inhibitor treatment over 24 weeks                                                                                                                                                               |
| CIRT-CFR<br>trial(23)<br><i>NCT02786134</i>          | Previous MI or<br>multivessel<br>CAD     | N13-NH3<br>or Rb 82<br>PET      | Change from<br>baseline MBFR                                      | There was no change in MBFR from baseline in either patients randomized to methotrexate or placebo.                                                                                                                              |
| Leccisotti L et al.<br>2022(24)                      | Type 2 DM                                | N13-NH3<br>PET                  | MBFR                                                              | Dapagliflozin significantly improved MBFR vs. placebo.                                                                                                                                                                           |
| SIMPLE trial(25)                                     | Type 2 DM at<br>high CV risk             | Rb-82 PET                       | MBFR                                                              | No change in MBFR from baseline either with empagliflozin or placebo                                                                                                                                                             |
| <i>SALTIRE II,</i><br><i>NCT02132026</i>             | Aortic stenosis                          | 18F-NaF<br>PET                  | Microcalcification<br>activity                                    | Denosumab and alendronic acid did not affect the calcification activity within the aortic valve                                                                                                                                  |
| BASIK-2,<br><i>NCT02917525</i>                       | Aortic stenosis                          | 18F-NaF<br>PET                  | Microcalcification<br>activity                                    | The effects of Vitamin K2 on the calcification activity within the aortic valve                                                                                                                                                  |
| ECAV,<br><i>NCT03217786</i>                          | Cardiac<br>transplant                    | Rb 82 PET                       | PET MBF                                                           | Change in percent intimal volume and myocardial blood flow                                                                                                                                                                       |
| MARINER<br><i>NCT06089486</i>                        | Cardiac<br>transplant                    | Rb 82 PET                       | PET MBF                                                           | Surveillance strategy using surrogate biomarker (PET MBF) vs. invasive angiography with intracoronary imaging                                                                                                                    |
| NEURO-<br>TTRansform<br><i>NCT04136184</i>           | Cardiac<br>amyloidosis                   | Technetium<br>pyrophosph<br>ate |                                                                   | Change in volumetric heart to lung ratio                                                                                                                                                                                         |

|                                    |                                     |                       |                             |                                                                                                                                   |
|------------------------------------|-------------------------------------|-----------------------|-----------------------------|-----------------------------------------------------------------------------------------------------------------------------------|
|                                    |                                     |                       |                             |                                                                                                                                   |
| Evuzamitide<br><i>NCT05635045</i>  | Cardiac amyloidosis                 | 124I-evuzamitide PET  | Quantitative uptake         | Change in radiotracer activity after one year of treatment                                                                        |
| I-CARE<br><i>NCT05776212</i>       | Cardiac Amyloidosis                 | 18F-NaF PET           | Microcalcification activity | Baseline measures and change in uptake in 18F-NaF PET activity                                                                    |
| ADMIRE-HF<br><i>NCT00126425</i>    | Heart failure with LVEF $\leq 35\%$ | I123 MIBG             | heart to mediastinum ratio  | Prospective validation of the prognostic utility of heart to mediastinum ratio                                                    |
| CHASM CS-RCT<br><i>NCT03593759</i> | Active cardiac sarcoidosis          | FDG and perfusion PET | Summed rest score           | Low-dose prednisone/methotrexate combination will have no inferior efficacy to standard dose prednisone with respect to endpoints |

## REFERENCES:

1. Shaw LJ, Berman DS, Maron DJ, et al. Optimal medical therapy with or without percutaneous coronary intervention to reduce ischemic burden: results from the Clinical Outcomes Utilizing Revascularization and Aggressive Drug Evaluation (COURAGE) trial nuclear substudy. *Circulation*. 2008;117:1283-1291.
2. Shaw LJ, Cerqueira MD, Brooks MM, et al. Impact of left ventricular function and the extent of ischemia and scar by stress myocardial perfusion imaging on prognosis and therapeutic risk reduction in diabetic patients with coronary artery disease: results from the Bypass Angioplasty Revascularization Investigation 2 Diabetes (BARI 2D) trial. *J Nucl Cardiol*. 2012;19:658-669.
3. Mahmarian JJ, Dakik HA, Filipchuk NG, et al. An initial strategy of intensive medical therapy is comparable to that of coronary revascularization for suppression of scintigraphic ischemia in high-risk but stable survivors of acute myocardial infarction. *J Am Coll Cardiol*. 2006;48:2458-2467.
4. Mahmarian JJ, Cerqueira MD, Iskandrian AE, et al. Regadenoson induces comparable left ventricular perfusion defects as adenosine: a quantitative analysis from the ADVANCE MPI 2 trial. *JACC Cardiovasc Imaging*. 2009;2:959-968.
5. Mahmarian JJ, Fenimore NL, Marks GF, et al. Transdermal nitroglycerin patch therapy reduces the extent of exercise-induced myocardial ischemia: results of a double-blind, placebo-controlled trial using quantitative thallium-201 tomography. *J Am Coll Cardiol*. 1994;24:25-32.
6. Parisi AF, Hartigan PM, Folland ED. Evaluation of exercise thallium scintigraphy versus exercise electrocardiography in predicting survival outcomes and morbid cardiac events in patients with single- and double-vessel disease. Findings from the Angioplasty Compared to Medicine (ACME) Study. *J Am Coll Cardiol*. 1997;30:1256-1263.

7. Burns SM, Brown S, White CA, Tait S, Sharples L, Schofield PM. Quantitative analysis of myocardial perfusion changes with transmyocardial laser revascularization. *Am J Cardiol.* 2001;87:861-867.
8. Grines CL, Watkins MW, Mahmarian JJ, et al. A randomized, double-blind, placebo-controlled trial of Ad5FGF-4 gene therapy and its effect on myocardial perfusion in patients with stable angina. *J Am Coll Cardiol.* 2003;42:1339-1347.
9. Henry TD, Annex BH, McKendall GR, et al. The VIVA trial: Vascular endothelial growth factor in Ischemia for Vascular Angiogenesis. *Circulation.* 2003;107:1359-1365.
10. Aqel RA, Hage FG, Zohgbi GJ, et al. Serial evaluations of myocardial infarct size after alcohol septal ablation in hypertrophic cardiomyopathy and effects of the changes on clinical status and left ventricular outflow pressure gradients. *Am J Cardiol.* 2008;101:1328-1333.
11. Venkataraman R, Aljaroudi W, Belardinelli L, Heo J, Iskandrian AE. The effect of ranolazine on the vasodilator-induced myocardial perfusion abnormality. *J Nucl Cardiol.* 2011;18:456-462.
12. Bober RM, Milani RV, Oktay AA, Javed F, Polin NM, Morin DP. The impact of revascularization on myocardial blood flow as assessed by positron emission tomography. *Eur J Nucl Med Mol Imaging.* 2019;46:1226-1239.
13. Driessen RS, Danad I, Stuijzand WJ, et al. Impact of Revascularization on Absolute Myocardial Blood Flow as Assessed by Serial [(15)O]H(2)O Positron Emission Tomography Imaging: A Comparison With Fractional Flow Reserve. *Circ Cardiovasc Imaging.* 2018;11:e007417.
14. de Winter RW, Jukema RA, van Diemen PA, et al. The impact of coronary revascularization on vessel-specific coronary flow capacity and long-term outcomes: a serial [15O]H2O positron emission tomography perfusion imaging study. *Eur Heart J Cardiovasc Imaging.* 2022;23:743-752.

15. Parodi O, Neglia D, Palombo C, et al. Comparative effects of enalapril and verapamil on myocardial blood flow in systemic hypertension. *Circulation*. 1997;96:864-873.
16. Buus NH, Bottcher M, Jorgensen CG, et al. Myocardial perfusion during long-term angiotensin-converting enzyme inhibition or beta-blockade in patients with essential hypertension. *Hypertension*. 2004;44:465-470.
17. Yokoyama I, Inoue Y, Moritan T, Ohtomo K, Nagai R. Impaired myocardial vasodilatation during hyperaemic stress is improved by simvastatin but not by pravastatin in patients with hypercholesterolaemia. *Eur Heart J*. 2004;25:671-679.
18. Akinboboye OO, Chou RL, Bergmann SR. Augmentation of myocardial blood flow in hypertensive heart disease by angiotensin antagonists: a comparison of lisinopril and losartan. *J Am Coll Cardiol*. 2002;40:703-709.
19. Baller D, Notohamiprodjo G, Gleichmann U, Holzinger J, Weise R, Lehmann J. Improvement in coronary flow reserve determined by positron emission tomography after 6 months of cholesterol-lowering therapy in patients with early stages of coronary atherosclerosis. *Circulation*. 1999;99:2871-2875.
20. Safdar B, D'Onofrio G, Dziura J, Russell RR, Johnson C, Sinusas AJ. Ranolazine and Microvascular Angina by PET in the Emergency Department: Results From a Pilot Randomized Controlled Trial. *Clin Ther*. 2017;39:55-63.
21. Cheng K, Tan S-T, Wechalekar K, Keramida G, de Silva R. Redistribution of myocardial perfusion after coronary sinus reducer implantation demonstrated by rubidium-82 positron emission tomography. *Journal of Nuclear Cardiology*. 2024;33.
22. Weber B, Weisenfeld D, Massarotti E, et al. Interplay Between Systemic Inflammation, Myocardial Injury, and Coronary Microvascular Dysfunction in Rheumatoid Arthritis: Results From the LiiRA Study. *J Am Heart Assoc*. 2024;13:e030387.
23. Taqueti VR, Shah AM, Everett BM, et al. Coronary Flow Reserve, Inflammation, and Myocardial Strain: The CIRT-CFR Trial. *JACC Basic Transl Sci*. 2023;8:141-151.

- 24.** Leccisotti L, Cinti F, Sorice GP, et al. Dapagliflozin improves myocardial flow reserve in patients with type 2 diabetes: the DAPAHEART Trial: a preliminary report. *Cardiovasc Diabetol.* 2022;21:173.
  
- 25.** Jurgens M, Schou M, Hasbak P, et al. Effects of Empagliflozin on Myocardial Flow Reserve in Patients With Type 2 Diabetes Mellitus: The SIMPLE Trial. *J Am Heart Assoc.* 2021;10:e020418.
